# Supplementary material for: Enhanced Intestinal TGF-β/SMAD-Dependent Signaling in Simian Immunodeficiency Virus Infected Rhesus Macaques
Source: MDPI journal article supplement (doi:10.3390/cells10040806), 2021-04-04

## **Supplemental Figures:**

**Supplemental Figure S1.** Intracellular cytokine flow cytometry for TGF- $\beta$  responses from a representative SIV infected RhM. Cells were gated first on singlets, live cells and then gated based as CD3<sup>+</sup>, CD20<sup>+</sup> and CD3<sup>−</sup>CD20<sup>−</sup> cells based on their surface CD3 and CD20 expression. Cell subsets were further gated as TGF- $\beta$ <sup>+</sup> and TGF- $\beta$ <sup>−</sup> cells based on the production of TGF- $\beta$  as shown in the box. The frequency in each box and in quadrant represents the frequency of that subpopulation. The bottom contour plot shows the overlay distribution of TGF- $\beta$ <sup>+</sup> cells gated from CD3<sup>−</sup>CD20<sup>−</sup> cell population. Interestingly, the majority of the cells displayed high forward and side scatter, suggesting that TGF- $\beta$ <sup>+</sup> cells are bigger in size and/or complexity or granularity like macrophages, NKs and/or dendritic cells.

**Supplemental Figure S2.** Mean values of the respective population positive of TGF- $\beta$ <sup>+</sup> from CD3<sup>−</sup>CD20<sup>−</sup> cells in SIV acutely infected macaques (21 dpi, n=3). Cells were gated first on singlets, live cells and then gated based as CD3<sup>+</sup>, CD20<sup>+</sup> and CD3<sup>−</sup>CD20<sup>−</sup> cells based on their surface CD3 and CD20 expression. The TGF- $\beta$ <sup>+</sup> cells from CD3<sup>−</sup>CD20<sup>−</sup> cells were further stained for different markers (NKG2A, CD163, CD14, CD45, CD68, CD8 and IL-10) and analyzed. Note, the majority of the TGF- $\beta$ <sup>+</sup> cells from CD3<sup>−</sup>CD20<sup>−</sup> cells were CD68 positive (mean  $\pm$  the standard errors,  $96.3 \pm 1.5$ ).

**Supplemental Figure S3.** Representative expression of TGF- $\beta$ RII in SIV-uninfected (FK25), control as well as acute (CF65, 21 dpi), and chronic (EB09, 250 dpi) SIV infected RhMs by multi-label confocal microscopy. The labels in each image are indicated on the Y-axis. Epithelial cells (cytokeratin<sup>+</sup>) cells were positive for TGF- $\beta$ RII as represented by yellow arrows. Of note, we did not see any upregulation of TGF- $\beta$ RII expression in epithelial cells among SIV-infected and uninfected control RhMs.

**Supplemental Figure S4.** Relative fold changes (mean  $\pm$  the standard errors) of TGF- $\beta$ , SMAD3, and SMAD7 gene expression are shown in jejunum tissues from female RhMs (n=3). All samples were normalized against 18S rRNA expression, and fold changes are relative to mean expression levels in male RhMs (n=3). The values above the bar represent mean fold change value for that specific gene.

Supplemental Figure S1

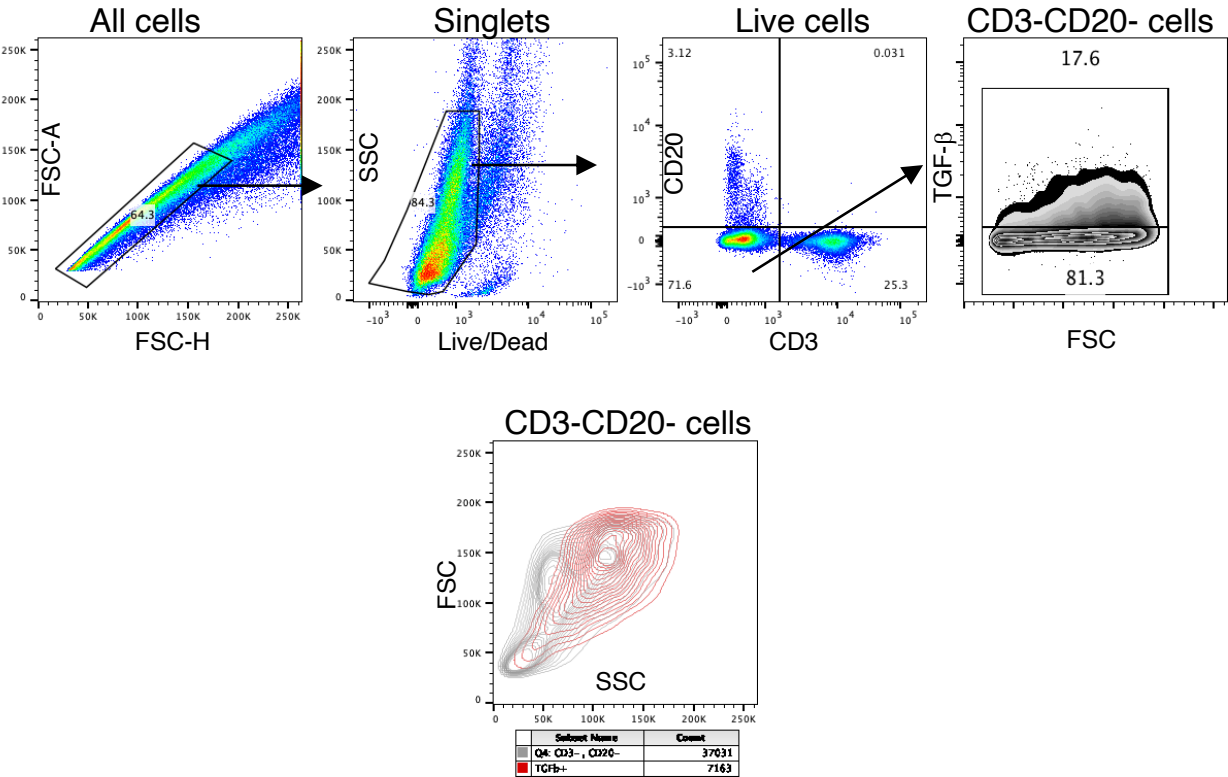

Supplemental Figure S2

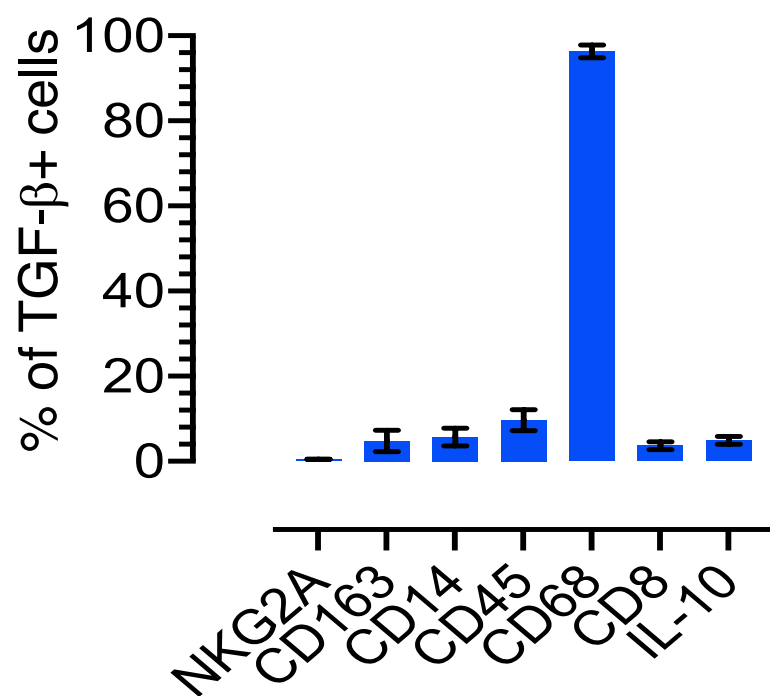

### Supplemental Figure S3

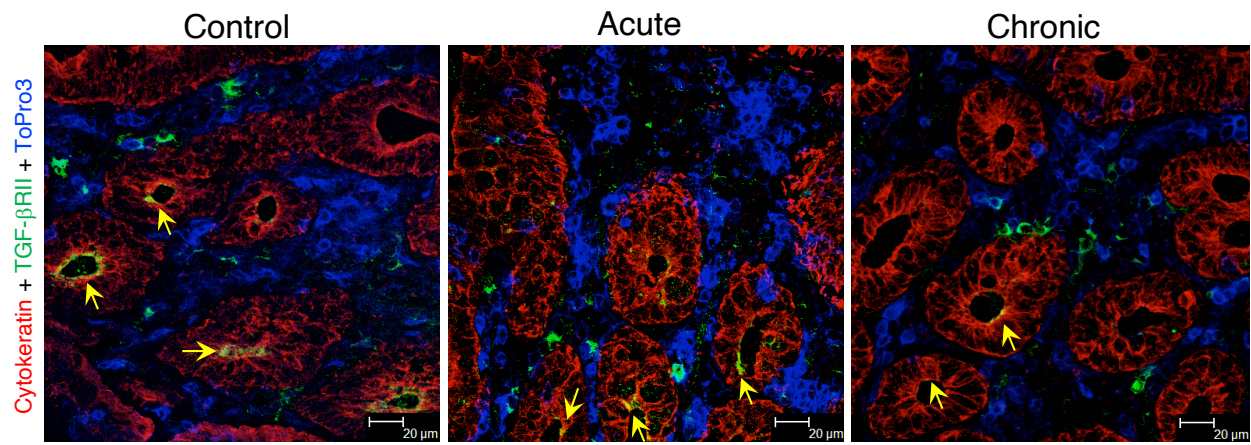

Supplemental Figure S4

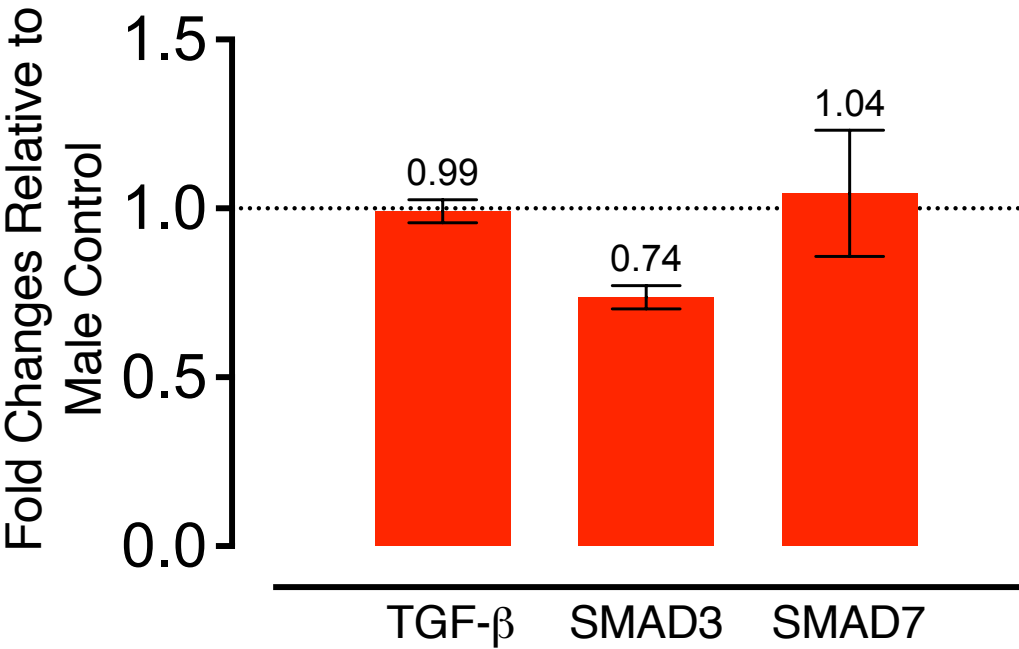

Supplement: s1 [file s1]
