# Supplementary material for: Enhanced Intestinal TGF-β/SMAD-Dependent Signaling in Simian Immunodeficiency Virus Infected Rhesus Macaques
Source: MDPI journal article supplement (doi:10.3390/cells10040806), 2021-04-04
Supplement: s1 [file s1]

**Supplemental Table S1. List of primary antibodies used for identifying mucosal mononuclear and epithelial cells in rhesus macaques by flow cytometry and immunohistochemistry staining**

| Antibody                                      | Isotype               | Clone     | Assay   | Working Dilution/<br>amount | Source                   |
|-----------------------------------------------|-----------------------|-----------|---------|-----------------------------|--------------------------|
| Anti-cow Cytokeratin, Wide Spectrum Screening | Rabbit polyclonal IgG | -         | IF      | 1:500                       | Dako                     |
| Anti-human CD3                                | Mouse IgG1            | SP34.2    | FC      | 5µl                         | BD Biosciences           |
| Anti-human CD3                                | Rabbit polyclonal     | -         | IF      | 1:100                       | Biocare Medical          |
| Anti-human CD11c                              | Mouse IgG1            | 3.9       | IF      | 1:50                        | Biolegend                |
| Anti-human CD4                                | Mouse IgG1            | L200      | FC      | 3 µl                        | BD Biosciences           |
| Anti-human CD8                                | Mouse IgG2a           | 3B5       | FC      | 3 µl                        | Invitrogen               |
| Anti-human CD14                               | Mouse IgG2a           | M5E2      | FC      | 5 µl                        | Biolegend                |
| Anti-human CD20                               | Mouse IgG2b           | 2H7       | FC      | 2 µl                        | Biolegend                |
| Anti-NHP CD45                                 | Mouse IgG1            | D058-1283 | FC      | 5 µl                        | BD Biosciences           |
| Anti-human CD68                               | Mouse IgG1            | KP1       | FC, IF  | 5 µl, 1:50                  | Santa Cruz Biotechnology |
| Anti-human CD79a                              | Mouse IgG1            | HM47      | IF      | 1:100                       | BD Biosciences           |
| Anti-human CD159a (NKG2A)                     | Mouse IgG2b           | Z199      | FC      | 5 µl                        | Beckman Coulter          |
| Anti-human CD163                              | Mouse IgG1            | GHI/61    | FC      | 5 µl                        | Biolegend                |
| Anti-human IL-10                              | Rat IgG1              | JES3-9D7  | FC      | 5 µl                        | Biolegend                |
| Anti-human Smad7                              | Mouse IgG2a           | Z8-B      | IF      | 1:50                        | Santa Cruz Biotechnology |
| Anti-human TGF-β1                             | Mouse IgG1            | TB21      | IHC     | 1:100                       | Santa Cruz Biotechnology |
| Anti-human TGF-β1                             | Mouse IgG1            | 9016      | FC      | 10 µl                       | R&D Systems              |
| Anti-human TGF-βRII                           | Goat IgG              | -         | FC, IF  | 10 µl, 1:100                | R&D Systems              |
| Anti-human macrophage                         | Mouse IgM             | HAM56     | IF      | 1:50                        | Enzo                     |
| Anti-human myeloid/histiocyte antigen         | Mouse IgG1            | MAC387    | IF      | 1:100                       | Dako                     |
| pSMAD2/3                                      | Rabbit polyclonal     | -         | IF      | 1:50                        | Santa Cruz Biotechnology |
| Mouse IgG1 kappa isotype control              | Mouse IgG1            |           | IHC, IF | 1:100                       | Invitrogen               |
| Mouse IgG2a                                   | Mouse IgG2a           |           | IF      | 1:50                        | Invitrogen               |
| Normal mouse IgM                              | Mouse IgM             |           | IF      | 1:50                        | Santa Cruz Biotechnology |
| Normal Goat IgG                               | Goat IgG              |           | IF      | 1:100                       | R&D Systems              |
| Normal Rabbit IgG control                     | Rabbit IgG            |           | IF      | 1:100                       | R&D Systems              |

**Note:** Before all staining, the dilution of the respective antibodies was determined after serial dilution experiment.  
FC, IF and IHC denote flow cytometry, immunofluorescence and immunohistochemistry, respectively.
